# Supplementary material for: Kaempferia parviflora Extract Inhibits STAT3 Activation and Interleukin-6 Production in HeLa Cervical Cancer Cells
Source: PubMed Central journal article supplement (PMC6747281; doi:10.3390/ijms20174226), 2019-08-29
Supplement: ijms-20-04226-s001.pdf [file ijms-20-04226-s001.pdf]

## Supplementary Figures

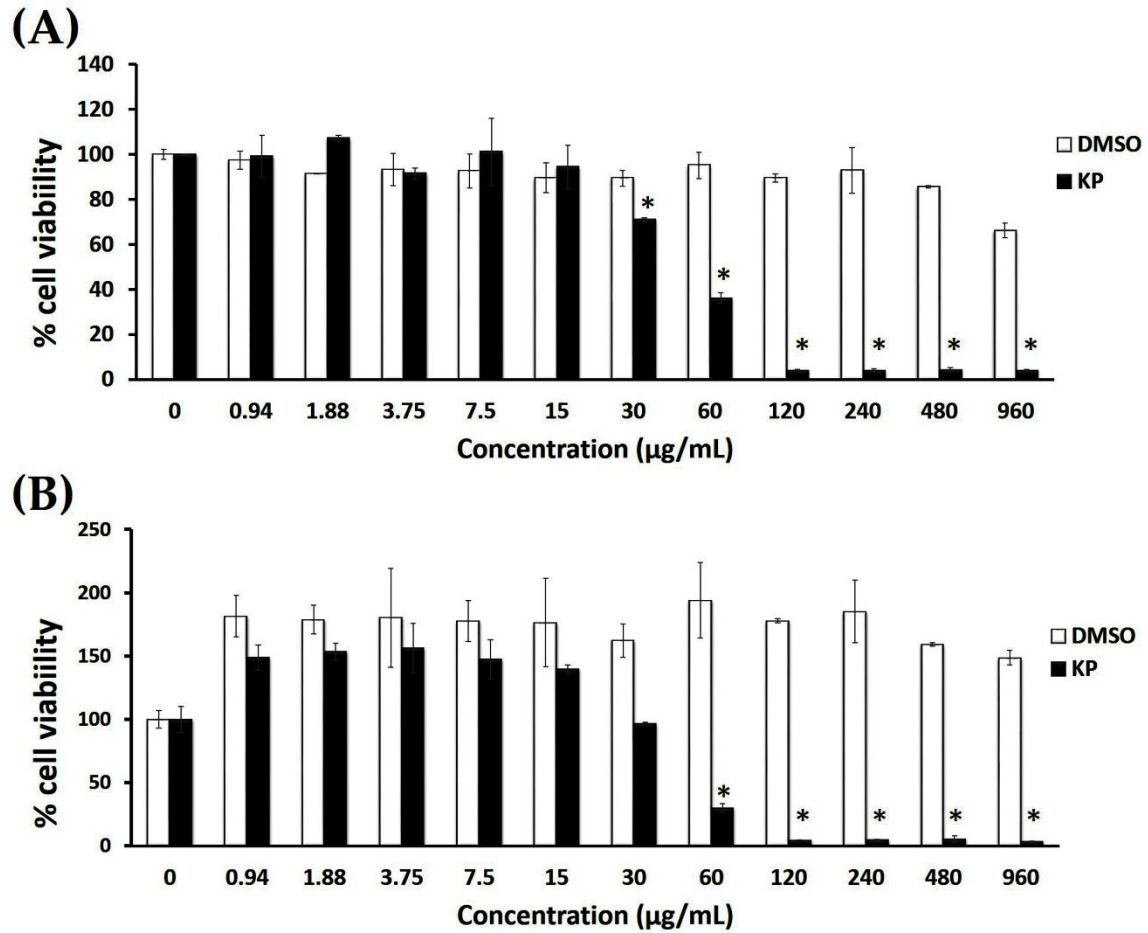

**Figure S1.** The cytotoxicity effect of different concentrations of KP ethanol extract on HeLa cells without EGF **(A)** and with 100 ng/mL EGF **(B)**. DMSO was used as a vehicle control. All data were from 3 independent experiments and reported as means  $\pm$  SD of each quadruplicate  $*p < 0.05$  compared to the untreated control (0  $\mu\text{g/mL}$ ).

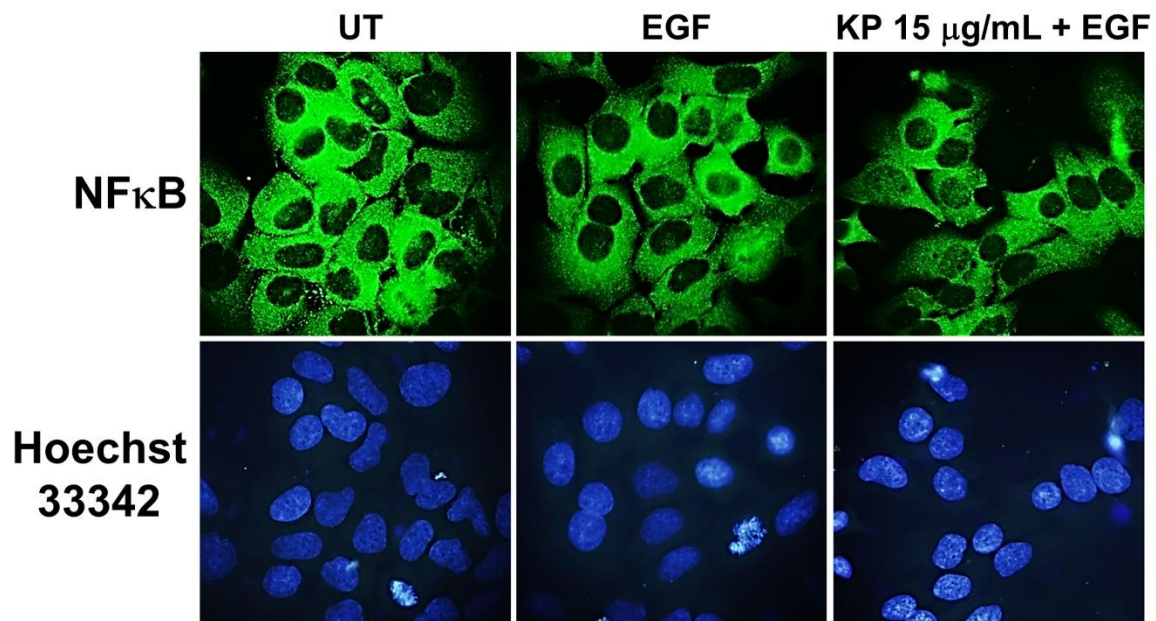

**Figure S2.** The effects of KP on nuclear localization of NF- $\kappa$ B in HeLa cells (A) Representative images from immunofluorescence study showing NF- $\kappa$ B staining (green) in untreated cells (UT), EGF-treated for 24 h, or HeLa cells treated with KP at 15  $\mu\text{g}/\text{mL}$  and EGF for 24 h. Nuclei (blue) were counterstained with 10  $\mu\text{g}/\text{mL}$  of Hoechst 33342. Micrographs were captured at 40X magnification. Data are representatives of three replicates.
